# Supplementary material
Source: publisher figshare collection journal article supplement (https://sage.figshare.com/ndownloader/files/16188179)
Supplement: Supplementary file 1 [file 16188179]

# Randomized Controlled Study to Evaluate Microbial Ecological Effects of CPP-ACP and Cranberry on Dental Plaque

N. Philip, S.J. Leishman, H.M.H.N. Bandara, D.L. Healey, and L.J. Walsh

## Appendix

**Appendix Table 1.** Bacterial prevalence at the baseline visit across the three treatment groups

| Bacterial Species                             | All Samples<br>(n = 71) | CPP-ACP<br>(n = 22) | All-in-One<br>(n = 23) | Control<br>(n = 26) | P-value |
|-----------------------------------------------|-------------------------|---------------------|------------------------|---------------------|---------|
| <i>Actinomyces gerensceriae</i>               | 70 (99%)                | 21 (96)             | 23 (100%)              | 26 (100%)           | 0.32    |
| <i>Corynebacterium durum</i>                  | 70 (99%)                | 21 (96)             | 23 (100%)              | 26 (100%)           | 0.32    |
| <i>Lactobacillus gasseri</i>                  | 13 (18%)                | 2 (9%)              | 4 (17%)                | 7 (27%)             | 0.28    |
| <i>Neisseria flavescens</i>                   | 63 (89%)                | 19 (86%)            | 22 (96%)               | 22 (85%)            | 0.44    |
| <i>Prevotella denticola</i>                   | 56 (79%)                | 17 (77%)            | 18 (78%)               | 21 (81%)            | 0.95    |
| <i>Rothia aeria/dentocariosa</i>              | 71 (100%)               | 22 (100%)           | 23 (100%)              | 26 (100%)           | δ       |
| <i>Streptococcus mitis/oralis</i>             | 71 (100%)               | 22 (100%)           | 23 (100%)              | 26 (100%)           | δ       |
| <i>Streptococcus mutans</i>                   | 54 (76%)                | 16 (73%)            | 18 (78%)               | 20 (77%)            | 0.90    |
| <i>Streptococcus parasanguinis</i>            | 5 (7%)                  | 0 (0%)              | 1 (4%)                 | 4 (15%)             | 0.09    |
| <i>Streptococcus salivarius/ thermophilus</i> | 71 (100%)               | 22 (100%)           | 23 (100%)              | 26 (100%)           | δ       |
| <i>Streptococcus sanguinis</i>                | 71 (100%)               | 22 (100%)           | 23 (100%)              | 26 (100%)           | δ       |
| <i>Streptococcus sobrinus</i>                 | 2 (2.8%)                | 0 (0%)              | 0 (0%)                 | 2 (8%)              | 0.17    |
| <i>Scardovia wiggsiae</i>                     | 42 (59%)                | 13 (59%)            | 13 (57%)               | 16 (62%)            | 0.94    |
| <i>Veillonella parvula</i>                    | 71 (100%)               | 22 (100%)           | 23 (100%)              | 26 (100%)           | δ       |

Baseline prevalence data showing number of samples in which the bacterial species was detected and values in brackets representing % prevalence. No significant differences between the treatment groups at the baseline visit ( $P > 0.05$ ; chi-square test). δ: no statistics computed because bacterial prevalence was a constant.

**Appendix Table 2.** Demographic characteristics of the study population

|                    | <b>CPP-ACP Group</b> | <b>All-in-One Group</b> | <b>Control Group</b> | <b><i>P</i>-values</b> |
|--------------------|----------------------|-------------------------|----------------------|------------------------|
| Mean Age $\pm$ S.D | 14.33 $\pm$ 1.64     | 14.0 $\pm$ 1.55         | 14.03 $\pm$ 1.79     | 0.70                   |
| Female, n(%)       | 19(63%)              | 16(53%)                 | 19(63%)              | 0.46                   |

**Appendix Table 3.** Relative abundance of each *caries-associated* bacterial species at the baseline and recall visits, and the subsequent fold change in bacterial load over time

| Bacterial Species                  | $\Delta Ct$ Baseline Visit |            |         | $\Delta Ct$ Recall Visit |            |         | $\Delta\Delta Ct$ |            |         | Fold change |            |         |
|------------------------------------|----------------------------|------------|---------|--------------------------|------------|---------|-------------------|------------|---------|-------------|------------|---------|
|                                    | CPP-ACP                    | All-in-One | Control | CPP-ACP                  | All-in-One | Control | CPP-ACP           | All-in-One | Control | CPP-ACP     | All-in-One | Control |
| <i>Veillonella parvula</i>         | -9.75                      | -9.50      | -8.32   | -8.06                    | -6.37      | -8.46   | 1.68              | 3.13       | -0.14   | 0.31        | 0.11       | 1.10    |
| <i>Streptococcus mutans</i>        | 3.51                       | 1.85       | 2.55    | 4.45                     | 3.99       | 1.23    | 0.94              | 2.14       | -1.33   | 0.52        | 0.23       | 2.51    |
| <i>Actinomyces gerensceriae</i>    | -4.33                      | -5.56      | -4.60   | -2.75                    | -4.46      | -4.36   | 1.58              | 1.10       | 0.24    | 0.33        | 0.47       | 0.85    |
| <i>Streptococcus parasanguinis</i> | 9.55                       | 9.27       | 7.97    | 10.40                    | 10.59      | 9.42    | 0.85              | 1.32       | 1.45    | 0.56        | 0.40       | 0.37    |
| <i>Streptococcus sobrinus</i>      | 9.55                       | 9.86       | 9.44    | 10.26                    | 10.59      | 9.92    | 0.71              | 0.73       | 0.48    | 0.61        | 0.60       | 0.72    |
| <i>Scardovia wiggsiae</i>          | 5.37                       | 4.94       | 5.09    | 6.18                     | 4.92       | 4.49    | 0.81              | -0.01      | -0.60   | 0.57        | 1.01       | 1.52    |
| <i>Lactobacillus gasseri</i>       | 9.01                       | 8.63       | 9.13    | 9.10                     | 9.04       | 9.21    | 0.09              | 0.41       | 0.08    | 0.94        | 0.75       | 0.95    |
| <i>Prevotella denticola</i>        | -0.32                      | 0.72       | 1.28    | -1.45                    | -0.19      | -0.96   | -1.12             | -0.92      | -2.25   | 2.18        | 1.89       | 4.74    |

The Ct value of each bacterial target was normalized to the mean Ct value of all bacterial species ( $\Delta Ct = Ct_{\text{bacterial species}} - Ct_{\text{mean of all bacterial species}}$ ). The  $\Delta\Delta Ct$  for each bacterial species was then calculated as follows:  $\Delta\Delta Ct = \Delta Ct_{\text{bacterial species (recall visit)}} - \Delta Ct_{\text{bacterial species (baseline visit)}}$ . Fold increase, or decrease, in bacterial abundance from the baseline to recall visit for each trial group was calculated based on the formula:  $2^{-\Delta\Delta Ct}$ . Ratio below 1 indicates lower relative abundance; a ratio above 1 indicates higher relative abundance.

**Appendix Table 4.** Relative abundance of each *health-associated* bacterial species at the baseline and recall visits, and the subsequent fold change in bacterial load over time

| Bacterial Species                            | ΔCt Baseline Visit |            |         | ΔCt Recall Visit |            |         | ΔΔCt    |            |         | Fold change |            |         |
|----------------------------------------------|--------------------|------------|---------|------------------|------------|---------|---------|------------|---------|-------------|------------|---------|
|                                              | CPP-ACP            | All-in-One | Control | CPP-ACP          | All-in-One | Control | CPP-ACP | All-in-One | Control | CPP-ACP     | All-in-One | Control |
| <i>Corynebacterium durum</i>                 | 0.77               | -0.81      | -0.86   | -3.09            | -3.43      | -1.80   | -3.85   | -2.61      | -0.94   | 14.45       | 6.11       | 1.92    |
| <i>Neisseria flavescens</i>                  | -0.06              | 1.14       | 1.58    | -1.09            | -2.48      | 2.23    | -1.03   | -3.62      | 0.65    | 2.05        | 12.27      | 0.64    |
| <i>Streptococcus sanguinis</i>               | -7.92              | -7.27      | -8.31   | -9.47            | -9.05      | -7.19   | -1.55   | -1.78      | 1.12    | 2.92        | 3.44       | 0.46    |
| <i>Streptococcus mitis/oralis</i>            | -6.60              | -6.13      | -6.64   | -6.34            | -6.11      | -6.03   | 0.26    | 0.02       | 0.62    | 0.84        | 0.98       | 0.65    |
| <i>Rothia aeria/dentocariosa</i>             | -5.63              | -4.39      | -6.00   | -5.59            | -5.12      | -5.10   | 0.04    | -0.73      | 0.89    | 0.97        | 1.65       | 0.54    |
| <i>Streptococcus salivarius/thermophilus</i> | -3.14              | -2.74      | -2.31   | -2.56            | -1.93      | -2.59   | 0.59    | 0.81       | -0.27   | 0.67        | 0.57       | 1.21    |

The Ct value of each bacterial target was normalized to the mean Ct value of all bacterial species ( $\Delta Ct = Ct^{\text{bacteria species}} - Ct^{\text{mean of all bacterial species}}$ ). The  $\Delta\Delta Ct$  for each bacterial species was then calculated as follows:  $\Delta\Delta Ct = \Delta Ct^{\text{bacterial species (recall visit)}} - \Delta Ct^{\text{bacterial species (baseline visit)}}$ . Fold increase, or decrease, in bacterial abundance from the baseline to recall visit for each trial group was calculated based on the formula:  $2^{-\Delta\Delta Ct}$ . Ratio below 1 indicates lower relative abundance; a ratio above 1 indicates higher relative abundance.
